# Supplementary material for: How Reversible Are the Effects of Fumed Silica on Macrophages? A Proteomics-Informed View
Source: MDPI journal article supplement (doi:10.3390/nano10101939), 2020-09-29
Supplement: s1 [file s1]

Supplementary table 4: Modulated pathways highlighted by the DAVID functional annotation clustering tool, for cells treated with colloidal silica [10]

| <b>Annotation Cluster 1</b> Enrichment Score: 4,18144249257887   |                                                          |       |             |                                                |                 |         |
|------------------------------------------------------------------|----------------------------------------------------------|-------|-------------|------------------------------------------------|-----------------|---------|
| Category                                                         | Term                                                     | Count | PValue      | Genes                                          | Fold Enrichment | FDR     |
| GOTERM_CC_DIRECT                                                 | <b>GO:000502~proteasome complex</b>                      | 6     | 1,09E-05    | P97372, Q9CX56, P99026, P46471, Q9R1P1, Q9Z2X2 | 20,31           | 0,00044 |
| UP_KEYWORDS                                                      | <b>Proteasome</b>                                        | 5     | 6,66E-05    | P97372, Q9CX56, P99026, P46471, Q9R1P1         | 22,75           | 0,00266 |
| KEGG_PATHWAY                                                     | <b>mmu03050:Proteasome</b>                               | 5     | 3,93E-04    | P97372, Q9CX56, P99026, P46471, Q9R1P1         | 14,01           | 0,02710 |
| <b>Annotation Cluster 2</b> Enrichment Score: 2,284642433915229  |                                                          |       |             |                                                |                 |         |
| Category                                                         | Term                                                     | Count | PValue      | Genes                                          | Fold Enrichment | FDR     |
| INTERPRO                                                         | <b>IPR002108:Actin-binding, cofilin/tropomyosin type</b> | 3     | 7,77E-04    | Q9Z0P5, P18760, Q91YR1                         | 70,21           | 0,19105 |
| GOTERM_BP_DIRECT                                                 | <b>GO:0051016~barbed-end actin filament capping</b>      | 3     | 0,00228343  | Q9Z0P5, P47754, Q91YR1                         | 41,35           | 0,96008 |
| UP_KEYWORDS                                                      | <b>Actin-binding</b>                                     | 4     | 0,07486874  | Q9Z0P5, P47754, P18760, Q91YR1                 | 4,04            | 0,39930 |
| GOTERM_MF_DIRECT                                                 | <b>GO:0003779~actin binding</b>                          | 5     | 0,074912681 | Q9Z0P5, P47754, P18760, Q91YR1, P19973         | 3,11            | 0,75848 |
| <b>Annotation Cluster 3</b> Enrichment Score: 2,2736727703379787 |                                                          |       |             |                                                |                 |         |
| Category                                                         | Term                                                     | Count | PValue      | Genes                                          | Fold Enrichment | FDR     |
| UP_KEYWORDS                                                      | NADP                                                     | 6     | 6,03E-04    | Q923D2, Q9CY64, O88844, Q99LB6, Q8K2T1, Q64105 | 8,74            | 0,01609 |
| UP_SEQ_FEATURE                                                   | binding site:NADP                                        | 3     | 0,006581131 | O88844, Q8K2T1, Q64105                         | 24,29           | 0,58387 |
| UP_SEQ_FEATURE                                                   | nucleotide phosphate-binding region:NADP                 | 3     | 0,038024095 | O88844, Q8K2T1, Q64105                         | 9,64            | 0,88596 |
| <b>Annotation Cluster 4</b> Enrichment Score: 1,9799880012073776 |                                                          |       |             |                                                |                 |         |
| Category                                                         | Term                                                     | Count | PValue      | Genes                                          | Fold Enrichment | FDR     |
| UP_KEYWORDS                                                      | <b>Tricarboxylic acid cycle</b>                          | 3     | 0,004213574 | O88844, Q9Z2I8, Q8BMF4                         | 30,58           | 0,05618 |
| KEGG_PATHWAY                                                     | <b>mmu01130:Biosynthesis of antibiotics</b>              | 3     | 0,004213574 | O88844, Q9Z2I8, Q8BMF4                         | 30,58           | 0,05618 |

|                             |                                        |       |             |                                                                                                               |                 |         |
|-----------------------------|----------------------------------------|-------|-------------|---------------------------------------------------------------------------------------------------------------|-----------------|---------|
| GOTERM_BP_DIRECT            | GO:0006099~tricarboxylic acid cycle    | 7     | 0,006195389 | P12382, Q920E5, O88844, Q9Z0S1, Q9Z2I8, Q8BMF4, Q9D7G0                                                        | 4,12            | 0,19892 |
| KEGG_PATHWAY                | <b>mmu01200:Carbon metabolism</b>      | 3     | 0,007439951 | O88844, Q9Z2I8, Q8BMF4                                                                                        | 22,81           | 0,96008 |
| KEGG_PATHWAY                | mmu01230:Biosynthesis of amino acids   | 5     | 0,012523794 | P12382, O88844, Q9Z2I8, Q8BMF4, Q9D7G0                                                                        | 5,43            | 0,24690 |
| KEGG_PATHWAY                | mmu00020:Citrate cycle (TCA cycle)     | 4     | 0,021214743 | P12382, O88844, Q99LB6, Q9D7G0                                                                                | 6,64            | 0,34820 |
|                             |                                        | 3     | 0,02555107  | O88844, Q9Z2I8, Q8BMF4                                                                                        | 11,82           | 0,35260 |
| <b>Annotation Cluster 5</b> | Enrichment Score: 1,8522219849064838   |       |             |                                                                                                               |                 |         |
| Category                    | Term                                   |       |             |                                                                                                               |                 |         |
| UP_KEYWORDS                 | NADP                                   | Count | PValue      | Genes                                                                                                         | Fold Enrichment | FDR     |
| UP_KEYWORDS                 | <b>Oxidoreductase</b>                  | 6     | 6,03E-04    | Q923D2, Q9CY64, O88844, Q99LB6, Q8K2T1, Q64105 P09528, Q923D2, Q9CY64, O88844, Q9CQU0, P62259, P35700, Q64105 | 8,74            | 0,01609 |
| GOTERM_MF_DIRECT            | GO:0016491~oxidoreductase activity     | 8     | 0,012119744 | P09528, Q923D2, Q9CY64, O88844, Q9CQU0, P35700, Q64105                                                        | 3,19            | 0,12928 |
| GOTERM_BP_DIRECT            | GO:0055114~oxidation-reduction process | 7     | 0,064679029 | P09528, Q923D2, Q9CY64, O88844, Q9CQU0, P35700, Q64105                                                        | 2,44            | 0,70853 |
|                             |                                        | 7     | 0,082458015 | P09528, Q923D2, Q9CY64, O88844, Q9CQU0, P35700, Q64105                                                        | 2,28            | 1,00000 |
| <b>Annotation Cluster 6</b> | Enrichment Score: 1,8148662468770735   |       |             |                                                                                                               |                 |         |
| Category                    | Term                                   |       |             |                                                                                                               |                 |         |
| UP_KEYWORDS                 | <b>Mitochondrion</b>                   | Count | PValue      | Genes                                                                                                         | Fold Enrichment | FDR     |
| UP_KEYWORDS                 | Transit peptide                        | 13    | 7,77E-04    | Q8BFR5, Q60930, P30416, Q9Z2I8, P70444, Q8BMF4, Q99J99, P67778, Q8K1Z0, P38060, O88441, Q9JIY5, Q9QYB1        | 3,13            | 0,01777 |
| UP_SEQ_FEATURE              | transit peptide:Mitochondrion          | 6     | 0,048392576 | Q8BFR5, Q8K1Z0, P38060, Q9Z2I8, Q8BMF4, Q9JIY5                                                                | 3,00            | 0,33173 |
|                             |                                        | 6     | 0,095493551 | Q8BFR5, Q8K1Z0, P38060, Q9Z2I8, Q8BMF4, Q9JIY5                                                                | 2,45            | 1,00000 |
| <b>Annotation Cluster 7</b> | Enrichment Score: 1,7170923275646146   |       |             |                                                                                                               |                 |         |

| Category                    | Term                                                              |       |             |                                                                                                                                                                        |                 |         |
|-----------------------------|-------------------------------------------------------------------|-------|-------------|------------------------------------------------------------------------------------------------------------------------------------------------------------------------|-----------------|---------|
| GOTERM_MF_DIRECT            | <b>GO:0098641~cadherin binding involved in cell-cell adhesion</b> | Count | PValue      | Genes                                                                                                                                                                  | Fold Enrichment | FDR     |
| GOTERM_CC_DIRECT            | <b>GO:0005913~cell-cell adherens junction</b>                     | 6     | 0,010125714 | P10107, Q9Z0P5, O88844, Q91YR1, P62259, P35700                                                                                                                         | 4,52            | 0,22185 |
| GOTERM_BP_DIRECT            | <b>GO:0098609~cell-cell adhesion</b>                              | 6     | 0,013145635 | P10107, Q9Z0P5, O88844, Q91YR1, P62259, P35700                                                                                                                         | 4,24            | 0,20527 |
| <b>Annotation Cluster 8</b> | Enrichment Score: 1,691469256512831                               | 4     | 0,053029287 | Q9Z0P5, O88844, Q91YR1, P35700                                                                                                                                         | 4,67            | 1,00000 |
| Category                    | Term                                                              |       |             |                                                                                                                                                                        |                 |         |
| UP_KEYWORDS                 | Magnesium                                                         | Count | PValue      | Genes                                                                                                                                                                  | Fold Enrichment | FDR     |
| UP_KEYWORDS                 | Metal-binding                                                     | 9     | 9,45E-04    | P12382, Q9QZE7, Q920E5, Q9WUL7, O88844, P55264, Q9Z0S1, Q9D7I5, Q9D7G0                                                                                                 | 4,40            | 0,01891 |
|                             |                                                                   |       |             | P09528, Q8BFS6, Q9QZE7, Q920E5, P10107, P55264, Q9CY64, Q99L45, Q9CPU0, P46737, Q8BWU5, P12382, Q9WUL7, O88844, Q9Z0S1, P38060, Q9D7I5, P62137, Q9D7G0, Q3U1C6         | 1,50            | 0,35771 |
| GOTERM_MF_DIRECT            | GO:0046872~metal ion binding                                      | 20    | 0,060363647 | P09528, Q8BFS6, Q9QZE7, Q920E5, P10107, P55264, Q9CY64, Q99L45, Q9Z2I8, Q9CPU0, P46737, Q8BWU5, P12382, Q9WUL7, O88844, Q9Z0S1, P38060, Q9D7I5, P62137, Q9D7G0, Q3U1C6 | 1,32            | 0,97571 |
|                             |                                                                   | 21    | 0,147647788 |                                                                                                                                                                        |                 |         |
