# Supplementary material for: How Reversible Are the Effects of Fumed Silica on Macrophages? A Proteomics-Informed View
Source: MDPI journal article supplement (doi:10.3390/nano10101939), 2020-09-29
Supplement: s1 [file s1]

Supplementary Table 1: proteins showing a significant change in abundance vs control in one of the two tested conditions

bold: proteins with a change greater in amplitude at the end of the recovery period compared to the change observed immediately after exposure

italics : proteins showing a significant change by the Mann-Whitney U test but not by the Student T test

when present : ac=acidic form; bas=basic form : med=median form

| code            | name                                              | accession            | peptide<br>count | percent seq<br>coverage | ratio<br>acute/ctrl | T test acute vs<br>ctrl | ratio<br>recov/ctrl | T test recov<br>vs ctrl |
|-----------------|---------------------------------------------------|----------------------|------------------|-------------------------|---------------------|-------------------------|---------------------|-------------------------|
| 14-3-3 zeta     | 14-3-3 protein zeta/delta                         | P63101               | 21               | 75%                     | 0,76290             | 0,02651                 | 0,99007             | 0,92966                 |
| aars ac         | Alanine--tRNA ligase, cytoplasmic                 | Q8BGQ7               | 39               | 49%                     | 1,57024             | 0,01813                 | 1,18233             | 0,59140                 |
| aars bas        | Alanine--tRNA ligase, cytoplasmic                 | Q8BGQ7               | 46               | 55%                     | 1,49569             | 0,03230                 | 1,07151             | 0,81469                 |
| aars $\Sigma$   | Alanine--tRNA ligase, cytoplasmic                 | Q8BGQ7               |                  |                         | 1,53022             | 0,02138                 | 1,12284             | 0,70052                 |
| acoc            | Cytoplasmic aconitate hydratase                   | P28271               | 5                | 5%                      | 0,50617             | 0,04263                 | 1,03364             | 0,90416                 |
| <b>akr1a1</b>   | <b><i>Alcohol dehydrogenase [NADP(+)]</i></b>     | <b><i>Q9JII6</i></b> | <b>17</b>        | <b>66%</b>              | <b>1,23212</b>      | <b>0,38746</b>          | <b>0,75380</b>      | <b>0,07708</b>          |
| <b>akr1b1</b>   | <b>Aldose reductase</b>                           | <b>P45376</b>        | <b>15</b>        | <b>50%</b>              | <b>0,90708</b>      | <b>0,33590</b>          | <b>0,82794</b>      | <b>0,03855</b>          |
| amrp            | Alpha-2-macroglobulin receptor-associated protein | P55302               | 29               | 61%                     | 0,61065             | 0,00437                 | 0,91219             | 0,62467                 |
| anxa2           | Annexin A2                                        | P07356               | 27               | 66%                     | 0,64136             | 0,01630                 | 0,97415             | 0,76721                 |
| anxa5 ac        | Annexin A5                                        | P48036               | 19               | 62%                     | 0,50928             | 0,04541                 | 0,65936             | 0,12303                 |
| anxa5 bas       | Annexin A5                                        | P48036               | 29               | 83%                     | 1,13620             | 0,04198                 | 1,14672             | 0,09548                 |
| anxa5 med       | Annexin A5                                        | P48036               | 23               | 56%                     | 0,81264             | 0,26440                 | 0,94032             | 0,62948                 |
| anxa5 $\Sigma$  | Annexin A5                                        | P48036               |                  |                         | 0,86677             | 0,22537                 | 0,95345             | 0,47953                 |
| ap3m1           | AP-3 complex subunit mu-1                         | Q9JKC8               | 18               | 67%                     | 2,23364             | 0,01103                 | 0,79387             | 0,64513                 |
| arl3            | ADP-ribosylation factor-like protein 3            | Q9WUL7               | 11               | 69%                     | 2,17187             | 0,01683                 | 1,22052             | 0,43727                 |
| atpb ac         | ATP synthase subunit beta, mitochondrial          | P56480               | 16               | 39%                     | 1,46182             | 0,04489                 | 1,22323             | 0,32400                 |
| atpb bas        | ATP synthase subunit beta, mitochondrial          | P56480               | 9                | 27%                     | 1,61813             | 0,01289                 | 1,21226             | 0,28437                 |
| atpb $\Sigma$   | ATP synthase subunit beta, mitochondrial          | P56480               |                  |                         | 1,54692             | 0,01159                 | 1,21726             | 0,27273                 |
| bpnt1           | 3'(2'),5'-bisphosphate nucleotidase 1             | Q9Z0S1               | 12               | 45%                     | 2,08832             | 0,01616                 | 1,18476             | 0,36510                 |
| bvra ac         | Biliverdin reductase A                            | Q9CY64               | 13               | 51%                     | 0,40829             | 0,03776                 | 1,00416             | 0,98931                 |
| <i>bvra bas</i> | <i>Biliverdin reductase A</i>                     | <i>Q9CY64</i>        | <i>14</i>        | <i>59%</i>              | <i>0,85976</i>      | <i>0,06744</i>          | <i>0,92202</i>      | <i>0,73954</i>          |
| bvra $\Sigma$   | Biliverdin reductase A                            | Q9CY64               |                  |                         | 0,70094             | 0,02176                 | 0,95091             | 0,84054                 |
| cah13           | Carbonic anhydrase 13                             | Q9D6N1               | 4                | 12%                     | 0,68610             | 0,04922                 | 0,91080             | 0,60251                 |

|                |                                                  |               |           |            |                |                |                |                |
|----------------|--------------------------------------------------|---------------|-----------|------------|----------------|----------------|----------------|----------------|
| cap1           | Adenylyl cyclase-associated protein 1            | P40124        | 9         | 22%        | 0,68705        | 0,03278        | 1,00948        | 0,96051        |
| capg           | Macrophage-capping protein                       | P24452        | 11        | 34%        | 0,80400        | 0,04840        | 0,91501        | 0,43314        |
| capg ac        | Macrophage-capping protein                       | P24452        | 12        | 49%        | 0,84106        | 0,06848        | 0,88736        | 0,30541        |
| capg $\Sigma$  | Macrophage-capping protein                       | P24452        |           |            | 0,82039        | 0,04019        | 0,90278        | 0,31255        |
| <b>casp3</b>   | <b>Caspase-3</b>                                 | <b>P70677</b> | <b>12</b> | <b>53%</b> | <b>0,99746</b> | <b>0,98635</b> | <b>0,68063</b> | <b>0,03546</b> |
| catS           | Cathepsin S                                      | O70370        | 6         | 22%        | 0,71356        | 0,02330        | 0,91490        | 0,32559        |
| caza2 ac       | F-actin-capping protein subunit alpha-2          | P47754        | 11        | 59%        | 1,79361        | 0,01906        | 1,11616        | 0,23413        |
| caza2 bas      | F-actin-capping protein subunit alpha-2          | P47754        | 6         | 29%        | 1,02448        | 0,85172        | 0,86522        | 0,25628        |
| caza2 $\Sigma$ | F-actin-capping protein subunit alpha-2          | P47754        |           |            | 1,31082        | 0,02220        | 0,95864        | 0,55954        |
| <b>ccs</b>     | <b>Copper chaperone for superoxide dismutase</b> | <b>Q9WU84</b> | <b>2</b>  | <b>8%</b>  | <b>0,94578</b> | <b>0,35003</b> | <b>1,20553</b> | <b>0,03962</b> |
| cdk6           | Cyclin-dependent kinase 6                        | Q64261        | 3         | 11%        | 0,69009        | 0,03320        | 0,81637        | 0,31945        |
| <b>chm2a</b>   | <b>Charged multivesicular body protein 2a</b>    | <b>Q9DB34</b> | <b>6</b>  | <b>26%</b> | <b>0,94643</b> | <b>0,39662</b> | <b>0,65042</b> | <b>0,00898</b> |
| cof bas        | Cofilin-1                                        | P18760        | 5         | 42%        | 0,51738        | 0,05847        | 0,94789        | 0,88027        |
| cpsn1 ac       | Calpain small subunit 1                          | O88456        | 5         | 33%        | 0,55295        | 0,03978        | 1,16217        | 0,26487        |
| cpsn1 bas      | Calpain small subunit 1                          | O88456        | 9         | 68%        | 1,09112        | 0,71534        | 0,95775        | 0,86606        |
| cpsn1 $\Sigma$ | Calpain small subunit 1                          | O88456        |           |            | 0,82100        | 0,11007        | 1,06036        | 0,54005        |
| dcup           | Uroporphyrinogen decarboxylase                   | P70697        | 4         | 14,00%     | 0,46458        | 0,02995        | 0,89999        | 0,45250        |
| dcxr           | L-xylulose reductase                             | Q91X52        | 8         | 42%        | 0,30716        | 0,04586        | 0,99983        | 0,99949        |
| ddx39b         | Spliceosome RNA helicase Ddx39b                  | Q9Z1N5        | 16        | 46%        | 1,33840        | 0,04630        | 0,99179        | 0,96254        |
| dhb8           | Estradiol 17-beta-dehydrogenase 8                | P50171        | 8         | 49%        | 1,43632        | 0,00789        | 0,77165        | 0,19337        |
| dj1 ac         | Protein deglycase DJ-1                           | Q99LX0        | 9         | 69%        | 0,60700        | 0,15160        | 1,00820        | 0,96792        |
| dj1 bas        | Protein deglycase DJ-1                           | Q99LX0        | 11        | 83%        | 1,64818        | 0,09085        | 0,92780        | 0,77092        |
| dj1 $\Sigma$   | Protein deglycase DJ-1                           | Q99LX0        |           |            | 1,11572        | 0,45086        | 0,96892        | 0,84485        |
| <b>dnja2</b>   | <b>DnaJ homolog subfamily A member 2</b>         | <b>Q9QYJ0</b> | <b>4</b>  | <b>9%</b>  | <b>0,95942</b> | <b>0,68473</b> | <b>0,69231</b> | <b>0,02057</b> |
| dpp3 ac        | Dipeptidyl peptidase 3                           | Q99KK7        | 11        | 22%        | 1,45965        | 0,09187        | 1,35807        | 0,37938        |
| dpp3 bas       | Dipeptidyl peptidase 3                           | Q99KK7        | 9         | 19%        | 1,76586        | 0,01153        | 1,37127        | 0,34811        |
| dpp3 $\Sigma$  | Dipeptidyl peptidase 3                           | Q99KK7        |           |            | 1,63796        | 0,01459        | 1,36576        | 0,35615        |
| ef1d           | Elongation factor 1-delta                        | P57776        | 5         | 21%        | 1,40944        | 0,00230        | 1,07337        | 0,39758        |
| esd            | S-formylglutathione hydrolase                    | Q9R0P3        | 14        | 73%        | 1,25939        | 0,02840        | 0,85967        | 0,09616        |
| fkbp4 ac       | Peptidyl-prolyl cis-trans isomerase FKBP4        | P30416        | 13        | 27,00%     | 1,17122        | 0,38770        | 0,85906        | 0,46634        |
| fkbp4 bas      | Peptidyl-prolyl cis-trans isomerase FKBP4        | P30416        | 23        | 50%        | 1,52073        | 0,18928        | 0,99570        | 0,98926        |

|                     |                                                       |               |           |            |                |                |                |                |
|---------------------|-------------------------------------------------------|---------------|-----------|------------|----------------|----------------|----------------|----------------|
| <i>fkbp4 med</i>    | Peptidyl-prolyl cis-trans isomerase FKBP4             | P30416        | 20        | 43%        | 1,56506        | 0,10775        | 0,90989        | 0,72179        |
| <i>fkbp4</i> ∑      | Peptidyl-prolyl cis-trans isomerase FKBP4             | P30416        |           |            | 1,44136        | 0,16404        | 0,92684        | 0,76864        |
| <i>fpys ac</i>      | Farnesyl pyrophosphate synthase                       | Q920E5        | 17        | 63%        | 1,02992        | 0,75642        | 1,13639        | 0,22162        |
| <i>fpys bas</i>     | Farnesyl pyrophosphate synthase                       | Q920E5        | 10        | 31%        | 1,40391        | 0,04292        | 1,24951        | 0,35046        |
| <i>fpys</i> ∑       | Farnesyl pyrophosphate synthase                       | Q920E5        |           |            | 1,14425        | 0,12395        | 1,17097        | 0,27736        |
| <i>gapdh</i>        | Glyceraldehyde-3-phosphate dehydrogenase              | P16858        | 22        | 59%        | 0,56124        | 0,01185        | 1,02877        | 0,84796        |
| <b>gars</b>         | <b>Glycine--tRNA ligase</b>                           | <b>Q9CZD3</b> | <b>22</b> | <b>36%</b> | <b>1,11067</b> | <b>0,72866</b> | <b>0,58764</b> | <b>0,01867</b> |
|                     | Guanine nucleotide-binding protein G(I)/G(S)/G(T)     |               |           |            |                |                |                |                |
| <i>gbb1</i>         | subunit beta-1                                        | P62874        | 7         | 24%        | 1,89777        | 0,01888        | 0,92893        | 0,41875        |
| <i>glrx3 ac</i>     | Glutaredoxin-3                                        | Q9CQM9        | 2         | 9%         | 1,23829        | 0,17960        | 0,97262        | 0,66012        |
| <i>glrx3 bas</i>    | Glutaredoxin-3                                        | Q9CQM9        | 11        | 41%        | 1,45099        | 0,04340        | 0,98694        | 0,88249        |
| <i>glrx3</i> ∑      | Glutaredoxin-3                                        | Q9CQM9        |           |            | 1,35547        | 0,07363        | 0,98051        | 0,79051        |
| <i>gmfb</i>         | Glia maturation factor beta                           | Q9CQI3        | 8         | 44%        | 0,75495        | 0,02699        | 1,22229        | 0,29340        |
| <i>grp75</i>        | Stress-70 protein, mitochondrial                      | O35501        | 25        | 43%        | 1,93665        | 0,00736        | 1,02408        | 0,88684        |
| <b><i>hmgcl</i></b> | <b>Hydroxymethylglutaryl-CoA lyase, mitochondrial</b> | <b>P38060</b> | <b>7</b>  | <b>34%</b> | <b>1,60154</b> | <b>0,12343</b> | <b>0,52947</b> | <b>0,07353</b> |
|                     | Heterogeneous nuclear ribonucleoprotein U-like        |               |           |            |                |                |                |                |
| <i>hnrl2</i>        | protein 2                                             | Q00PI9        | 13        | 19,00%     | 0,58894        | 0,01850        | 1,07315        | 0,88827        |
| <b>hook3</b>        | <b>Protein Hook homolog 3</b>                         | <b>Q8BUK6</b> | <b>4</b>  | <b>5%</b>  | <b>1,07412</b> | <b>0,65045</b> | <b>0,45019</b> | <b>0,00519</b> |
| <i>iF3M</i>         | Eukaryotic translation initiation factor 3 subunit M  | Q99JX4        | 20        | 64%        | 1,49603        | 0,02779        | 1,03209        | 0,81144        |
| <i>ima7</i>         | Importin subunit alpha-7                              | O35345        | 18        | 41%        | 2,11765        | 0,01582        | 0,84029        | 0,61907        |
| <b><i>imdH2</i></b> | <b>Inosine-5'-monophosphate dehydrogenase 2</b>       | <b>P24547</b> | <b>11</b> | <b>21%</b> | <b>1,30452</b> | <b>0,04136</b> | <b>1,33870</b> | <b>0,30872</b> |
| <i>ipyr</i>         | Inorganic pyrophosphatase                             | Q9D819        | 5         | 14%        | 1,89687        | 0,02540        | 0,98832        | 0,93752        |
| <i>kcy</i>          | UMP-CMP kinase                                        | Q9DBP5        | 10        | 59%        | 0,42646        | 0,03794        | 1,06299        | 0,80275        |
| <i>kpym ac</i>      | Pyruvate kinase PKM                                   | P52480        | 19        | 42%        | 0,65913        | 0,04843        | 0,98415        | 0,88103        |
| <i>kpym bas</i>     | Pyruvate kinase PKM                                   | P52480        | 27        | 61%        | 0,72140        | 0,05389        | 0,78313        | 0,10077        |
| <i>kpym</i> ∑       | Pyruvate kinase PKM                                   | P52480        |           |            | 0,68433        | 0,04725        | 0,90280        | 0,37449        |
| <i>ldha</i>         | L-lactate dehydrogenase A chain                       | P06151        | 20        | 44%        | 0,60178        | 0,00675        | 0,91651        | 0,63780        |
| <i>lypa1</i>        | Acyl-protein thioesterase 1                           | P97823        | 4         | 20%        | 1,40416        | 0,04461        | 0,89530        | 0,54447        |

|                    |                                                                                                                  |                      |           |            |                |                |                |                |
|--------------------|------------------------------------------------------------------------------------------------------------------|----------------------|-----------|------------|----------------|----------------|----------------|----------------|
| <b>maom</b>        | <b>NAD-dependent malic enzyme, mitochondrial</b>                                                                 | <b>Q99KE1</b>        | <b>22</b> | <b>57%</b> | <b>0,86697</b> | <b>0,28223</b> | <b>0,79794</b> | <b>0,02883</b> |
| <b>mapk1</b>       | <b>Mitogen-activated protein kinase 1</b>                                                                        | <b>P63085</b>        | <b>7</b>  | <b>16%</b> | <b>0,82515</b> | <b>0,02731</b> | <b>0,66086</b> | <b>0,01112</b> |
| mk14               | Mitogen-activated protein kinase 14                                                                              | P47811               | 13        | 57%        | 1,76129        | 0,03954        | 1,74841        | 0,03047        |
| mvp bas            | Major vault protein                                                                                              | Q9EQK5               | 7         | 10%        | 1,74152        | 0,00741        | 1,30534        | 0,60262        |
| mvp med            | Major vault protein                                                                                              | Q9EQK5               | 14        | 18%        | 1,68139        | 0,00736        | 1,21356        | 0,63499        |
| mvp $\Sigma$       | Major vault protein                                                                                              | Q9EQK5               |           |            | 1,70938        | 0,00982        | 1,25629        | 0,61698        |
| naa20              | N-alpha-acetyltransferase 20                                                                                     | ,P6160               | 5         | 35%        | 1,92416        | 0,00790        | 1,26842        | 0,07015        |
| naga ac            | N-acetylglucosamine-6-phosphate deacetylase                                                                      | Q8JZV7               | 9         | 31%        | 1,26353        | 0,02255        | 0,93615        | 0,72583        |
| ndus3              | NADH dehydrogenase [ubiquinone] iron-sulfur protein 3, mitochondrial                                             | Q9DCT2               | 5         | 23%        | 1,76446        | 0,00980        | 1,06141        | 0,71227        |
| nit1               | Nitrilase homolog 1                                                                                              | Q8VDK1               | 13        | 55%        | 0,53363        | 0,00972        | 0,82315        | 0,10447        |
| nsflc              | NSFL1 cofactor p47                                                                                               | Q9CZ44               | 8         | 28%        | 0,75149        | 0,03603        | 1,23871        | 0,16724        |
| odb2               | Lipoamide acyltransferase component of branched-chain alpha-keto acid dehydrogenase complex, mitochondrial       | P53395               | 18        | 42,00%     | 1,33892        | 0,03519        | 1,18731        | 0,24036        |
| odo2               | Dihydrolipoyllysine-residue succinyltransferase component of 2-oxoglutarate dehydrogenase complex, mitochondrial | Q9D2G2               | 9         | 24%        | 1,33185        | 0,01980        | 0,94383        | 0,79661        |
| pcbp1              | Poly(rC)-binding protein 1                                                                                       | P60335               | 14        | 75%        | 0,67657        | 0,04239        | 0,98541        | 0,92459        |
| pdcd6              | Programmed cell death protein 6                                                                                  | P12815               | 9         | 58%        | 1,32354        | 0,03975        | 1,05803        | 0,52904        |
| pdcd1              | Parkinson disease 7 domain-containing protein 1                                                                  | Q8BFQ8               | 3         | 19%        | 0,69947        | 0,20457        | 0,76998        | 0,01039        |
| pdia1 ac           | Protein disulfide-isomerase                                                                                      | P09103               | 20        | 42,00%     | 1,34229        | 0,13581        | 0,96016        | 0,84230        |
| pdia1 med          | Protein disulfide-isomerase                                                                                      | P09103               | 33        | 70,00%     | 1,60723        | 0,02123        | 1,02115        | 0,82547        |
| pdia1 $\Sigma$     | Protein disulfide-isomerase                                                                                      | P09103               |           |            | 1,46574        | 0,04547        | 0,93445        | 0,56375        |
| <b><i>pdxk</i></b> | <b><i>Pyridoxal kinase</i></b>                                                                                   | <b><i>Q8K183</i></b> | <b>7</b>  | <b>24%</b> | <b>1,46207</b> | <b>0,07857</b> | <b>0,58608</b> | <b>0,02273</b> |
| pgk1 ac            | Phosphoglycerate kinase 1                                                                                        | P09411               | 20        | 62%        | 0,62818        | 0,02486        | 0,93025        | 0,41128        |
| pgk1 bas           | Phosphoglycerate kinase 1                                                                                        | P09411               | 25        | 69,00%     | 0,79014        | 0,04707        | 0,97776        | 0,75765        |
| pgk1 sum           | Phosphoglycerate kinase 1                                                                                        | P09411               |           |            | 0,69633        | 0,02968        | 0,95024        | 0,49578        |
| pgls               | 6-phosphogluconolactonase                                                                                        | Q9CQ60               | 9         | 51%        | 1,48915        | 0,02618        | 0,94561        | 0,64183        |
| phb                | Prohibitin                                                                                                       | P67778               | 12        | 53%        | 1,27375        | 0,00183        | 0,98638        | 0,78453        |

|                |                                                         |               |           |            |                |                |                |                |
|----------------|---------------------------------------------------------|---------------|-----------|------------|----------------|----------------|----------------|----------------|
| pipna          | Phosphatidylinositol transfer protein alpha isoform     | P53810        | 23        | 76%        | 0,70142        | 0,02782        | 0,87336        | 0,22829        |
| <b>prps1</b>   | <b>Ribose-phosphate pyrophosphokinase 1</b>             | <b>,Q9D7G</b> | <b>10</b> | <b>39%</b> | <b>1,09710</b> | <b>0,56441</b> | <b>0,66283</b> | <b>0,01079</b> |
| prx3           | Thioredoxin-dependent peroxide reductase, mitochondrial | P20108        | 3         | 11%        | 1,83406        | 0,02181        | 0,82291        | 0,37112        |
| <b>prx6</b>    | <b>Peroxiredoxin-6</b>                                  | <b>O08709</b> | <b>17</b> | <b>80%</b> | <b>1,01587</b> | <b>0,82669</b> | <b>0,79438</b> | <b>0,00237</b> |
| psa1           | Proteasome subunit alpha type-1                         | Q9R1P4        | 17        | 76%        | 1,34609        | 0,03449        | 0,86170        | 0,06202        |
| <b>psb10</b>   | <b>Proteasome subunit beta type-10</b>                  | <b>O35955</b> | <b>8</b>  | <b>38%</b> | <b>1,45026</b> | <b>0,03400</b> | <b>0,64042</b> | <b>0,06162</b> |
| psb4 ac        | Proteasome subunit beta type-4                          | P99026        | 3         | 16%        | 2,90441        | 0,03758        | 1,01946        | 0,93154        |
| psb4 bas       | Proteasome subunit beta type-4                          | P99026        | 8         | 49%        | 1,48629        | 0,14464        | 1,07429        | 0,32620        |
| psb4 $\Sigma$  | Proteasome subunit beta type-4                          | P99026        |           |            | 2,04997        | 0,07086        | 1,05250        | 0,49369        |
| psmd2 ac       | 26S proteasome non-ATPase regulatory subunit 2          | Q8VDM4        | 11        | 14%        | 1,56132        | 0,13670        | 1,05633        | 0,78149        |
| psmd2 bas      | 26S proteasome non-ATPase regulatory subunit 2          | Q8VDM4        | 13        | 16%        | 1,68826        | 0,03615        | 1,04733        | 0,79279        |
| psmd2 $\Sigma$ | 26S proteasome non-ATPase regulatory subunit 2          | Q8VDM4        |           |            | 1,63196        | 0,04585        | 1,05132        | 0,75403        |
| <i>psmd8</i>   | 26S proteasome non-ATPase regulatory subunit 8          | Q9CX56        | 7         | 18%        | 1,26859        | 0,14314        | 0,69290        | 0,06247        |
| psmd14         | 26S proteasome non-ATPase regulatory subunit 14         | O35593        | 5         | 18%        | 1,51073        | 0,04974        | 0,90995        | 0,61498        |
| <i>pth2</i>    | Peptidyl-tRNA hydrolase 2, mitochondrial                | Q8R2Y8        | 4         | 32%        | 1,58200        | 0,07167        | 1,02366        | 0,91501        |
| ran b3/1       | Ran-binding protein 3                                   | Q9CT10        | 8         | 20%        | 2,21322        | 0,04081        | 3,38495        | 0,06131        |
| ranb3/2        | Ran-binding protein 3                                   | Q9CT10        | 10        | 24%        | 0,42471        | 0,05814        | 0,44310        | 0,00779        |
| rap1a          | Ras-related protein Rap-1A                              | P62835        | 3         | 21,00%     | 4,47577        | 0,03998        | 1,51363        | 0,35884        |
| rbm8a          | RNA-binding protein 8A                                  | Q9CWZ3        | 5         | 51%        | 1,52292        | 0,07422        | 1,29914        | 0,19575        |
| rm46           | 39S ribosomal protein L46, mitochondrial                | Q9EQI8        | 5         | 22%        | 2,06179        | 0,01680        | 0,77167        | 0,15948        |
| rssa           | 40S ribosomal protein SA                                | P14206        | 18        | 60%        | 1,40236        | 0,02817        | 0,97659        | 0,85186        |
| <b>sarnp</b>   | <b>SAP domain-containing ribonucleoprotein</b>          | <b>Q9D1J3</b> | <b>5</b>  | <b>28%</b> | <b>0,94784</b> | <b>0,44484</b> | <b>0,74430</b> | <b>0,00535</b> |
| sdcbl          | Syntenin-1                                              | O08992        | 3         | 26%        | 1,71727        | 0,02408        | 0,70053        | 0,05999        |
| <b>sera</b>    | <b>D-3-phosphoglycerate dehydrogenase</b>               | <b>Q61753</b> | <b>3</b>  | <b>7%</b>  | <b>0,74962</b> | <b>0,05766</b> | <b>0,46038</b> | <b>0,02610</b> |
| sias           | Sialic acid synthase OS=Homo sapiens                    | 9             | 9         | 32%        | 0,52749        | 0,03753        | 0,91001        | 0,52460        |
| snaa           | Alpha-soluble NSF attachment protein                    | Q9DB05        | 13        | 49%        | 1,70178        | 0,03251        | 1,03238        | 0,86345        |

|                 |                                                            |               |           |            |                |                |                |                |
|-----------------|------------------------------------------------------------|---------------|-----------|------------|----------------|----------------|----------------|----------------|
| <b>snd1</b>     | <b>Staphylococcal nuclease domain-containing protein 1</b> | <b>Q78PY7</b> | <b>17</b> | <b>28%</b> | <b>1,09108</b> | <b>0,66107</b> | <b>1,44869</b> | <b>0,00084</b> |
| <b>snx6 ac</b>  | <b>Sorting nexin-6</b>                                     | <b>Q6P8X1</b> | <b>9</b>  | <b>25%</b> | <b>1,06397</b> | <b>0,79998</b> | <b>1,22126</b> | <b>0,03157</b> |
| <b>snx6 bas</b> | <b>Sorting nexin-6</b>                                     | <b>Q6P8X1</b> | <b>18</b> | <b>44%</b> | <b>0,87703</b> | <b>0,41676</b> | <b>0,58176</b> | <b>0,00085</b> |
| snx6 $\Sigma$   | Sorting nexin-6                                            | Q6P8X1        |           |            | 0,96481        | 0,53074        | 0,88205        | 0,00774        |
| <b>spb6 ac</b>  | <b>Serpin B6</b>                                           | <b>Q60854</b> | <b>13</b> | <b>39%</b> | <b>0,82831</b> | <b>0,11344</b> | <b>1,22955</b> | <b>0,02473</b> |
| spb6 bas        | Serpin B6                                                  | Q60854        | 8         | 23%        | 1,56173        | 0,10652        | 1,07268        | 0,76891        |
| spb6 med        | Serpin B6                                                  | Q60854        | 9         | 26%        | 1,10774        | 0,59650        | 1,12246        | 0,48335        |
| spb6 $\Sigma$   | Serpin B6                                                  | Q60854        |           |            | 1,15245        | 0,42503        | 1,13442        | 0,39370        |
| spee            | Spermidine synthase                                        | Q64674        | 2         | 7%         | 1,79253        | 0,04341        | 0,91716        | 0,44984        |
| spre            | Sepiapterin reductase                                      | Q64105        | 13        | 63%        | 0,76223        | 0,03202        | 1,21136        | 0,39068        |
| ssrd            | Translocon-associated protein subunit delta                | Q62186        | 4         | 31%        | 1,88099        | 0,01196        | 1,21136        | 0,39068        |
| tmem11          | Transmembrane protein 11, mitochondrial                    | Q8BK08        | 6         | 35%        | 1,50361        | 0,01978        | 1,20958        | 0,55435        |
| tpm4            | Tropomyosin alpha-4 chain                                  | Q6IRU2        | 17        | 53%        | 0,38978        | 0,01036        | 0,50005        | 0,00116        |
| twf2            | Twinfilin-2                                                | Q9Z0P5        | 10        | 38%        | 0,67903        | 0,02618        | 0,92104        | 0,64849        |
| uba1            | Ubiquitin-like modifier-activating enzyme 1                | Q02053        | 25        | 34%        | 1,31969        | 0,02355        | 1,06249        | 0,79115        |
| <b>ubql1h</b>   | <b>Ubiquilin-1</b>                                         | <b>Q8R317</b> | <b>2</b>  | <b>3%</b>  | <b>0,89348</b> | <b>0,16595</b> | <b>0,69245</b> | <b>0,01325</b> |
| ubql4           | Ubiquilin-4 OS=Homo sapiens                                | Q9NRR5        | 2         | 3%         | 0,52405        | 0,02103        | 1,16653        | 0,71920        |
| uchl5           | Ubiquitin carboxyl-terminal hydrolase isozyme L5           | Q9WUP7        | 7         | 21%        | 1,35660        | 0,00756        | 1,00065        | 0,99354        |
| vata ac         | V-type proton ATPase catalytic subunit A                   | P50516        | 6         | 12,80%     | 1,55768        | 0,03123        | 0,96678        | 0,86184        |
| vata bas        | V-type proton ATPase catalytic subunit A                   | P50516        | 23        | 42%        | 1,76854        | 0,01711        | 1,06525        | 0,74919        |
| vata $\Sigma$   | V-type proton ATPase catalytic subunit A                   | P50516        |           |            | 1,65676        | 0,01117        | 1,01305        | 0,94648        |
| <b>vps29</b>    | <b>Vacuolar protein sorting-associated protein 29</b>      | <b>Q9QZ88</b> | <b>4</b>  | <b>21%</b> | <b>0,99265</b> | <b>0,98566</b> | <b>0,67061</b> | <b>0,02975</b> |
