# Supplementary material for: How Reversible Are the Effects of Fumed Silica on Macrophages? A Proteomics-Informed View
Source: MDPI journal article supplement (doi:10.3390/nano10101939), 2020-09-29
Supplement: s1 [file s1]

Supplementary Table 3: comparison of proteins showing a significant change after exposure to pyrolytic or colloidal silica [10]

I: increase in treated compared to control ; D: decrease in treated compared to control ; NC: no significant change when present : ac=acidic form; bas=basic form : med=median form

| code        | name                                                | accession | pyrolytic |                  |
|-------------|-----------------------------------------------------|-----------|-----------|------------------|
|             |                                                     |           | silica    | colloidal silica |
| 14-3-3 eps  | 14-3-3 protein epsilon                              | P62259    | NC        | D                |
| 14-3-3 zeta | 14-3-3 protein zeta/delta                           | P63101    | D         | NC               |
| aars ac     | Alanine--tRNA ligase, cytoplasmic                   | Q8BGQ7    | I         | NC               |
| aars bas    | Alanine--tRNA ligase, cytoplasmic                   | Q8BGQ7    | I         | NC               |
| acadl       | Long-chain specific acyl-CoA dehydrogenase          | Q8BFR5    | NC        | I                |
| acoc        | Cytoplasmic aconitate hydratase                     | P28271    | D         | NC               |
| adk         | adenosine kinase                                    | P55264    | NC        | D                |
| amrp        | Alpha-2-macroglobulin receptor-associated protein   | P55302    | D         | I                |
| anxa1       | Annexin A1                                          | P10107    | NC        | I                |
| anxa2       | Annexin A2                                          | P07356    | D         | NC               |
| anxa5 ac    | Annexin A5                                          | P48036    | D         | NC               |
| anxa5 bas   | Annexin A5                                          | P48036    | D         | NC               |
| ap3m1       | AP-3 complex subunit mu-1                           | Q9JKC8    | I         | NC               |
| arl3        | ADP-ribosylation factor-like protein 3              | Q9WUL7    | I         | D                |
| atpb ac     | ATP synthase subunit beta, mitochondrial            | P56480    | I         | NC               |
| atpb bas    | ATP synthase subunit beta, mitochondrial            | P56480    | I         | NC               |
| bid ac.     | BH3-interacting domain death agonist                | P70444    | NC        | D                |
| blvrb       | Biliverdin reductase B                              | Q923D2    | NC        | I                |
| bpnt1       | 3'(2'),5'-bisphosphate nucleotidase 1               | Q9Z0S1    | I         | I                |
| brcc3       | Lys63-deubiquitinase brcc36                         | P46737    | NC        | D                |
| bt3L4       | Transcription factor BTF3 homolog 4                 | Q9CQH7    | NC        | D                |
| bvra ac     | Biliverdin reductase A                              | Q9CY64    | D         | D                |
| bvra bas    | Biliverdin reductase A                              | Q9CY64    | D         | NC               |
| cab39 ac    | Calcium-binding protein 39                          | Q06138    | NC        | D                |
| cah13       | Carbonic anhydrase 13                               | Q9D6N1    | D         | NC               |
| cap1        | Adenylyl cyclase-associated protein 1               | P40124    | D         | NC               |
| capg        | Macrophage-capping protein                          | P24452    | D         | NC               |
| capg ac     | Macrophage-capping protein                          | P24452    | NC        | NC               |
| Casp 3 bas  | Caspase-3                                           | P70677    | NC        | D                |
| casp1       | Caspase-1                                           | P29452    | NC        | D                |
| catS        | Cathepsin S                                         | O70370    | D         | NC               |
| catZ        | Cathepsin Z                                         | Q9WUU7    | NC        | D                |
| caza2 ac    | F-actin-capping protein subunit alpha-2             | P47754    | I         | D                |
| cdc42       | Cell division control protein 42 homolog            | P60766    | NC        | D                |
| cdk6        | Cyclin-dependent kinase 6                           | Q64261    | D         | NC               |
| clic4 ac    | Chloride intracellular channel protein 4            | Q9QYB1    | NC        | I                |
| clic4 bas   | Chloride intracellular channel protein 4            | Q9QYB1    | NC        | I                |
| cof bas     | Cofilin-1                                           | P18760    | D         | NC               |
| cof ac      | Cofilin-1, monophosphorylated form                  | P18760    | NC        | D                |
| coq9        | Ubiquinone biosynthesis protein COQ9, mitochondrial | Q8K1Z0    | NC        | I                |
| cpped       | Serine/threonine-protein phosphatase CPPED1         | Q8BFS6    | NC        | D                |

|           |                                                                                                  |        |    |    |
|-----------|--------------------------------------------------------------------------------------------------|--------|----|----|
| cpsn1 ac  | Calpain small subunit 1                                                                          | O88456 | D  | NC |
| cpsn1 bas | Calpain small subunit 1                                                                          | O88456 | NC | NC |
| cryl1     | Lambda-crystallin homolog                                                                        | Q9CQT1 | NC | D  |
| ctbp1     | C-terminal-binding protein 1                                                                     | O88712 | NC | D  |
| dcup      | Uroporphyrinogen decarboxylase                                                                   | P70697 | D  | NC |
| dcxr      | L-xylulose reductase                                                                             | Q91X52 | D  | NC |
| ddx39b    | Spliceosome RNA helicase Ddx39b                                                                  | Q9Z1N5 | I  | NC |
| dhb8      | Estradiol 17-beta-dehydrogenase 8                                                                | P50171 | I  | NC |
| djl ac    | Protein deglycase DJ-1                                                                           | Q99LX0 | D  | NC |
| djl bas   | Protein deglycase DJ-1                                                                           | Q99LX0 | I  | NC |
| dnjc9     | DnaJ homolog subfamily C member 9                                                                | Q91WN1 | NC | D  |
| dnph1     | 2'-deoxynucleoside 5'-phosphate N-hydrolase 1                                                    | Q80VJ3 | NC | D  |
| dpp3 ac   | Dipeptidyl peptidase 3                                                                           | Q99KK7 | D  | NC |
| dpp3 bas  | Dipeptidyl peptidase 3                                                                           | Q99KK7 | I  | NC |
| ef1d      | Elongation factor 1-delta                                                                        | P57776 | I  | NC |
| eftu      | Elongation factor Tu, mitochondrial                                                              | Q8BFR5 | NC | I  |
| esd       | S-formylglutathione hydrolase                                                                    | Q9R0P3 | I  | NC |
| fa49b     | Protein FAM49B                                                                                   | Q921M7 | NC | D  |
| fkbp4 ac  | Peptidyl-prolyl cis-trans isomerase FKBP4                                                        | P30416 | NC | I  |
| fkbp4 bas | Peptidyl-prolyl cis-trans isomerase FKBP4                                                        | P30416 | NC | NC |
| fkbp4 med | Peptidyl-prolyl cis-trans isomerase FKBP4                                                        | P30416 | I  | I  |
| fpps ac   | Farnesyl pyrophosphate synthase                                                                  | Q920E5 | NC | NC |
| fpps bas  | Farnesyl pyrophosphate synthase                                                                  | Q920E5 | I  | I  |
| frih      | Ferritin heavy chain                                                                             | P09528 | NC | I  |
| galK ac   | Galactose kinase                                                                                 | Q9R0N0 | NC | D  |
| galK bas  | Galactose kinase                                                                                 | Q9R0N0 | NC | NC |
| gapdh     | Glyceraldehyde-3-phosphate dehydrogenase                                                         | P16858 | D  | NC |
| gbb1      | Guanine nucleotide-binding protein G(I)/G(S)/G(T)<br>subunit beta-1                              | P62874 | I  | I  |
| gbb2      | Guanine nucleotide-binding protein G(I)/G(S)/G(T)<br>subunit beta-2                              | P62880 | NC | I  |
| glrx3 ac  | Glutaredoxin-3                                                                                   | Q9CQM9 | NC | NC |
| glrx3 bas | Glutaredoxin-3                                                                                   | Q9CQM9 | I  | NC |
| gmfb      | Glia maturation factor beta                                                                      | Q9CQI3 | D  | NC |
| grp75     | Stress-70 protein, mitochondrial                                                                 | O35501 | I  | NC |
| hmgCL     | Hydroxymethylglutaryl-CoA lyase, mitochondrial<br>Heterogeneous nuclear ribonucleoprotein U-like | P38060 | NC | D  |
| hnrl2     | protein 2                                                                                        | Q00PI9 | D  | NC |
| htra2     | Serine protease HTRA2, mitochondrial                                                             | Q9JIY5 | NC | I  |
| hyou1 ac  | Hypoxia up-regulated protein 1                                                                   | Q9JKR6 | NC | I  |
| hyou1 bas | Hypoxia up-regulated protein 1                                                                   | Q9JKR6 | NC | I  |
| hyou1 med | Hypoxia up-regulated protein 1                                                                   | Q9JKR6 | NC | I  |
| idhc ac   | Isocitrate dehydrogenase, cytoplasmic                                                            | O88844 | NC | D  |
| idhc bas  | Isocitrate dehydrogenase, cytoplasmic                                                            | O88844 | NC | NC |
| if2b      | Translation initiation factor 2 subunit 2                                                        | Q99L45 | NC | I  |
| iF3M      | Eukaryotic translation initiation factor 3 subunit M                                             | Q99JX4 | I  | NC |
| ima7      | Importin subunit alpha-7                                                                         | O35345 | I  | NC |
| in35      | Interferon-induced 35 kDa protein homolog                                                        | Q9D8C4 | NC | D  |
| ipyr      | Inorganic pyrophosphatase                                                                        | Q9D819 | I  | NC |

|           |                                                                                                                  |        |    |    |
|-----------|------------------------------------------------------------------------------------------------------------------|--------|----|----|
| key       | UMP-CMP kinase                                                                                                   | Q9DBP5 | D  | NC |
| kpym ac   | Pyruvate kinase PKM                                                                                              | P52480 | D  | NC |
| kpym bas  | Pyruvate kinase PKM                                                                                              | P52480 | D  | NC |
| ldha      | L-lactate dehydrogenase A chain                                                                                  | P06151 | D  | NC |
| lgul      | Lactoylglutathione lyase                                                                                         | Q9CPU0 | NC | D  |
| lhpp      | Phospholysine phosphohistidine inorganic pyrophosphatase                                                         | Q9D7I5 | NC | I  |
| lsp1 ac   | Lymphocyte-specific protein 1                                                                                    | P19973 | NC | NC |
| lsp1 bas  | Lymphocyte-specific protein 1                                                                                    | P19973 | NC | D  |
| lypa1     | Acyl-protein thioesterase 1                                                                                      | P97823 | I  | NC |
| mat2b     | Methionine adenosyltransferase 2 subunit beta                                                                    | Q99LB6 | NC | D  |
| mk14      | Mitogen-activated protein kinase 14                                                                              | P47811 | I  | I  |
| mtna      | Methylthioribose-1-phosphate isomerase                                                                           | Q9CQT1 | NC | I  |
| mtx2      | Metaxin-2                                                                                                        | O88441 | NC | D  |
| mvp bas   | Major vault protein                                                                                              | Q9EQK5 | I  | NC |
| mvp med   | Major vault protein                                                                                              | Q9EQK5 | I  | NC |
| myd88     | Myeloid differentiation primary response protein MyD88                                                           | P22366 | NC | D  |
| naa20     | N-alpha-acetyltransferase 20                                                                                     | P6160  | I  | NC |
| naga ac   | N-acetylglucosamine-6-phosphate deacetylase                                                                      | Q8JZV7 | I  | NC |
| ndus3     | NADH dehydrogenase [ubiquinone] iron-sulfur protein 3, mitochondrial                                             | Q9DCT2 | I  | NC |
| nit1      | Nitrilase homolog 1                                                                                              | Q8VVK1 | D  | NC |
| nmr1l     | NmrA-like family domain-containing protein 1                                                                     | Q8K2T1 | NC | D  |
| nsf1c     | NSFL1 cofactor p47                                                                                               | Q9CZ44 | D  | D  |
| odb2      | Lipoamide acyltransferase component of branched-chain alpha-keto acid dehydrogenase complex, mitochondrial       | P53395 | I  | NC |
| odo2      | Dihydrolipoyllysine-residue succinyltransferase component of 2-oxoglutarate dehydrogenase complex, mitochondrial | Q9D2G2 | I  | NC |
| odp2 ac   | Dihydrolipoyllysine-residue acetyltransferase component of pyruvate dehydrogenase complex                        | Q8BMF4 | NC | I  |
| osgep     | Probable tRNA N6-adenosine threonylcarbamoyltransferase                                                          | Q8BWU5 | NC | D  |
| pcbp1     | Poly(rC)-binding protein 1                                                                                       | P60335 | D  | NC |
| pcna ac   | Proliferating cell nuclear antigen                                                                               | P17918 | NC | D  |
| pcna bas  | Proliferating cell nuclear antigen                                                                               | P17918 | NC | NC |
| pdcd6     | Programmed cell death protein 6                                                                                  | P12815 | I  | NC |
| pddc1     | Parkinson disease 7 domain-containing protein 1                                                                  | Q8BFQ8 | D  | D  |
| pde6d     | Retinal rod rhodopsin-sensitive cGMP 3',5'-cyclic phosphodiesterase                                              | O55057 | NC | I  |
| pdia1 ac  | Protein disulfide-isomerase                                                                                      | P09103 | NC | NC |
| pdia1 med | Protein disulfide-isomerase                                                                                      | P09103 | I  | NC |
| pfkal     | 6-phosphofructokinase, liver type                                                                                | P12382 | NC | I  |
| pgk1 ac   | Phosphoglycerate kinase 1                                                                                        | P09411 | D  | NC |
| pgk1 bas  | Phosphoglycerate kinase 1                                                                                        | P09411 | D  | NC |
| pgls      | 6-phosphogluconolactonase                                                                                        | Q9CQ60 | I  | NC |
| phb       | Prohibitin                                                                                                       | P67778 | I  | I  |
| pihd1     | PIH1 domain-containing protein 1                                                                                 | Q9WTM5 | NC | D  |
| pipna     | Phosphatidylinositol transfer protein alpha isoform                                                              | P53810 | D  | NC |
| pipnb     | Phosphatidylinositol transfer protein beta isoform                                                               | P53811 | NC | D  |
| ppac      | Low molecular weight phosphotyrosine protein phosphatase                                                         | Q9D358 | NC | D  |
| ppie      | Peptidyl-prolyl cis-trans isomerase E                                                                            | Q9QZH3 | NC | I  |

|           |                                                                  |        |    |    |
|-----------|------------------------------------------------------------------|--------|----|----|
| ppp1ca    | Serine/threonine-protein phosphatase PP1-alpha catalytic subunit | P62137 | NC | D  |
| prdx1ox   | Peroxiredoxin 1, oxidized form                                   | P35700 | NC | I  |
| prps1 a   | Ribose-phosphate pyrophosphokinase 1                             | Q9D7G0 | NC | I  |
| prps1 b   | Ribose-phosphate pyrophosphokinase 1                             | Q9D7G0 | NC | NC |
| prs7      | Proteasome regulatory subunit 7                                  | P46471 | NC | I  |
| prx3      | Thioredoxin-dependent peroxide reductase, mitochondrial          | P20108 | I  | NC |
| psa1      | Proteasome subunit alpha type-1                                  | Q9R1P4 | I  | NC |
| psb3 ac.  | Proteasome beta 3 subunit                                        | Q9R1P1 | NC | D  |
| psb3 bas  | Proteasome beta 3 subunit                                        | Q9R1P1 | NC | I  |
| psb4 ac   | Proteasome subunit beta type-4                                   | P99026 | I  | NC |
| psb4 bas  | Proteasome subunit beta type-4                                   | P99026 | I  | I  |
| psd10     | Proteasome regulatory subunit 10                                 | Q9Z2X2 | NC | I  |
| psd13     | Proteasome regulatory subunit 13                                 | Q9UNM6 | NC | I  |
| psmd14    | 26S proteasome non-ATPase regulatory subunit 14                  | O35593 | I  | NC |
| psmd2 ac  | 26S proteasome non-ATPase regulatory subunit 2                   | Q8VDM4 | I  | NC |
| psmd2 bas | 26S proteasome non-ATPase regulatory subunit 2                   | Q8VDM4 | I  | NC |
| psmd8     | Proteasome regulatory subunit 8                                  | Q9CX56 | NC | D  |
| psme2     | Proteasome activator complex subunit 2                           | P97372 | NC | I  |
| pth2      | Peptidyl-tRNA hydrolase 2, mitochondrial                         | Q8R2Y8 | I  | NC |
| ptpn6 ac  | Tyrosine-protein phosphatase non-receptor type 6                 | P29351 | NC | D  |
| ptpn6 bas | Tyrosine-protein phosphatase non-receptor type 6                 | P29351 | NC | NC |
| rab14     | Ras-related protein Rab-14                                       | Q91V41 | NC | D  |
| ran b3/1  | Ran-binding protein 3                                            | Q9CT10 | I  | NC |
| ranb3/2   | Ran-binding protein 3                                            | Q9CT10 | D  | NC |
| rap1a     | Ras-related protein Rap-1A                                       | P62835 | I  | NC |
| rbm8a     | RNA-binding protein 8A                                           | Q9CWZ3 | I  | NC |
| rfa2      | Replication protein A 32 kDa subunit                             | Q62193 | NC | D  |
| rfc2      | Replication factor C subunit 2                                   | P35250 | NC | D  |
| rhoA      | Transforming protein RhoA                                        | Q9QUI0 | NC | D  |
| rm46      | 39S ribosomal protein L46, mitochondrial                         | Q9EQI8 | I  | NC |
| rras      | Ras-related protein R-Ras                                        | P10833 | NC | D  |
| rssa      | 40S ribosomal protein SA                                         | P14206 | I  | NC |
| sae1 ac   | SUMO-activating enzyme subunit 1                                 | Q9R1T2 | NC | D  |
| sae1 bas  | SUMO-activating enzyme subunit 1                                 | Q9R1T2 | NC | D  |
| sarnp     | SAP domain-containing ribonucleoprotein                          | Q9D1J3 | NC | D  |
| sdcbl     | Syntenin-1                                                       | O08992 | I  | NC |
| sias      | Sialic acid synthase OS=Homo sapiens                             | D      | D  | NC |
| snaa      | Alpha-soluble NSF attachment protein                             | Q9DB05 | I  | NC |
| snap23    | Synaptosomal-associated protein 23                               | O09044 | NC | D  |
| snx6 ac.  | Sorting nexin 6                                                  | Q6P8X1 | NC | D  |
| spb6 bas  | Serpin B6                                                        | Q60854 | I  | NC |
| spb6 med  | Serpin B6                                                        | Q60854 | NC | NC |
| spee      | Spermidine synthase                                              | Q64674 | I  | NC |
| spre      | Sepiapterin reductase                                            | Q64105 | D  | D  |
| ssrd      | Translocon-associated protein subunit delta                      | Q62186 | I  | I  |
| strap ac  | Serine-threonine kinase receptor-associated protein              | Q9Z1Z2 | NC | D  |

|           |                                                                |        |    |    |
|-----------|----------------------------------------------------------------|--------|----|----|
| strap bas | Serine-threonine kinase receptor-associated protein            | Q9Z1Z2 | NC | NC |
| such2 ac  | Succinate-CoA ligase [GDP-forming] subunit beta, mitochondrial | Q9Z2I8 | NC | I  |
| such2 bas | Succinate-CoA ligase [GDP-forming] subunit beta, mitochondrial | Q9Z2I8 | NC | I  |
| tatd3     | Putative deoxyribonuclease TATDN3                              | Q3U1C6 | NC | D  |
| tcpz      | T-complex protein 1 subunit zeta                               | P80317 | NC | D  |
| thtm      | 3-mercaptopyruvate sulfurtransferase                           | Q99J99 | NC | I  |
| tmem11    | Transmembrane protein 11, mitochondrial                        | Q8BK08 | I  | NC |
| tpm4      | Tropomyosin alpha-4 chain                                      | Q6IRU2 | D  | NC |
| tsnax     | Translin-associated protein X                                  | Q9QZE7 | NC | D  |
| twf1      | Twinfilin-1                                                    | Q91YR1 | NC | I  |
| twf2      | Twinfilin-2                                                    | Q9Z0P5 | D  | D  |
| txd12     | Thioredoxin domain-containing protein 12                       | Q9CQU0 | NC | D  |
| uba1      | Ubiquitin-like modifier-activating enzyme 1                    | Q02053 | I  | NC |
| ube2n     | Ubiquitin conjugating enzyme 2N                                | P61088 | NC | D  |
| ubql4     | Ubiquilin-4 OS=Homo sapiens                                    | Q9NRR5 | D  | NC |
| uchl5     | Ubiquitin carboxyl-terminal hydrolase isozyme L5               | Q9WUP7 | I  | NC |
| vata ac   | V-type proton ATPase catalytic subunit A                       | P50516 | I  | NC |
| vata bas  | V-type proton ATPase catalytic subunit A                       | P50516 | I  | NC |
| vdac2     | Voltage-dependent anion-selective channel protein 2            | Q60930 | NC | I  |
| vps25     | Vacuolar protein-sorting-associated protein 25                 | Q9CQ80 | NC | D  |
