# Supplementary material for: How Reversible Are the Effects of Fumed Silica on Macrophages? A Proteomics-Informed View
Source: MDPI journal article supplement (doi:10.3390/nano10101939), 2020-09-29
Supplement: s1 [file s1]

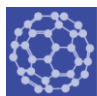

Article

# How Reversible Are the Effects of Fumed Silica on Macrophages? A Proteomics-Informed View

Anaëlle Torres <sup>1</sup>, Bastien Dalzon <sup>1</sup>, Véronique Collin-Faure <sup>1</sup>, Hélène Diemer <sup>2</sup>, Daphna Fenel <sup>3</sup>, Guy Schoehn <sup>3</sup>, Sarah Cianférani <sup>2</sup>, Marie Carrière <sup>4</sup> and Thierry Rabilloud <sup>1,\*</sup>

<sup>1</sup> Laboratory of Chemistry and Biology of Metals, University Grenoble Alpes, CNRS, CEA, UMR 5249, CEDEX 09, 38054 Grenoble, France; anaëlle.torres@cea.fr (A.T.); bastien.dalzon@cea.fr (B.D.); veronique.collin@cea.fr (V.C.-F.)

<sup>2</sup> Laboratoire de Spectrométrie de Masse BioOrganique, Université de Strasbourg, CNRS, IPHC UMR 7178, F-67087 Strasbourg, France; hdiemer@unistra.fr (H.D.); sarah.cianferani@unistra.fr (S.C.)

<sup>3</sup> Institute for Structural Biology, University Grenoble Alpes, CNRS, CEA, F-38000 Grenoble, France; daphna.fenel@ibs.fr (D.F.); guy.schoehn@ibs.fr (G.S.)

<sup>4</sup> Chimie Interface Biologie pour l'Environnement, la Santé et la Toxicologie (CIBEST), University Grenoble-Alpes, CEA, CNRS UMR 5819, IRIG-SyMMES, F-38054 Grenoble, France; marie.carriere@cea.fr

\* Correspondence: thierry.rabilloud@cnrs.fr

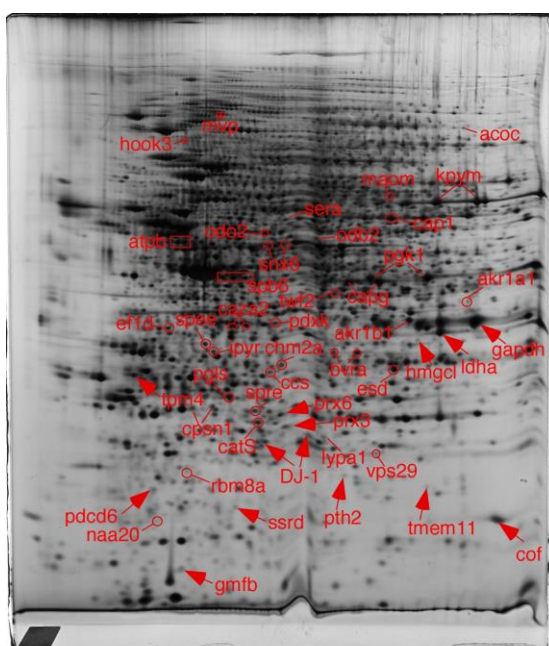

A

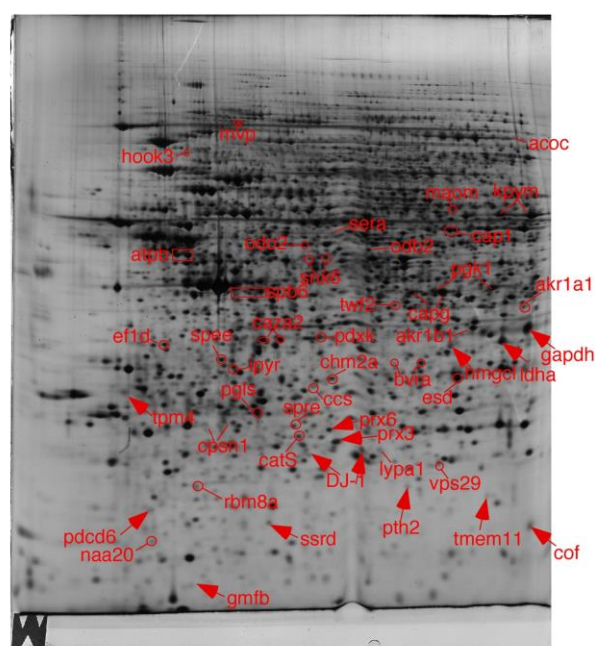

B

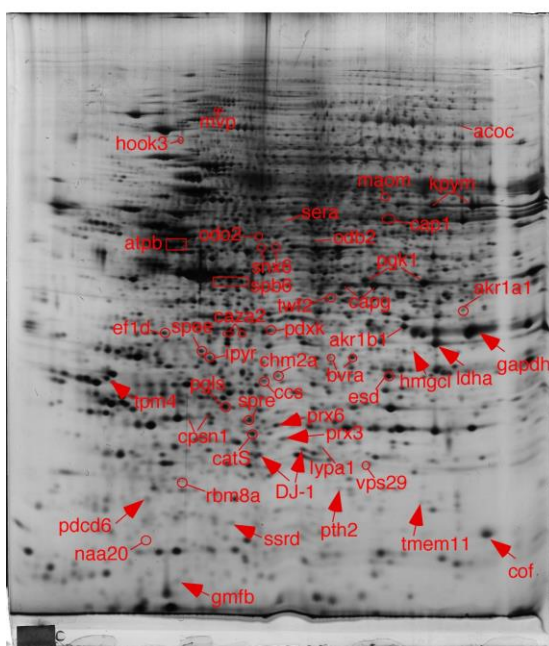

C

### Supplementary Figure 1:

#### Annotated gel images

A: control, unexposed cells

B : cells exposed to pyrolytic silica for 24 hours and collected just after exposure

C: cells exposed to pyrolytic silica for 24 hours, and left to recover without silica for 72 hours prior to harvesting

Proteins belonging to central metabolism, endosome/lysosome pathway and cytoskeleton are highlighted in this figure

Figure S1

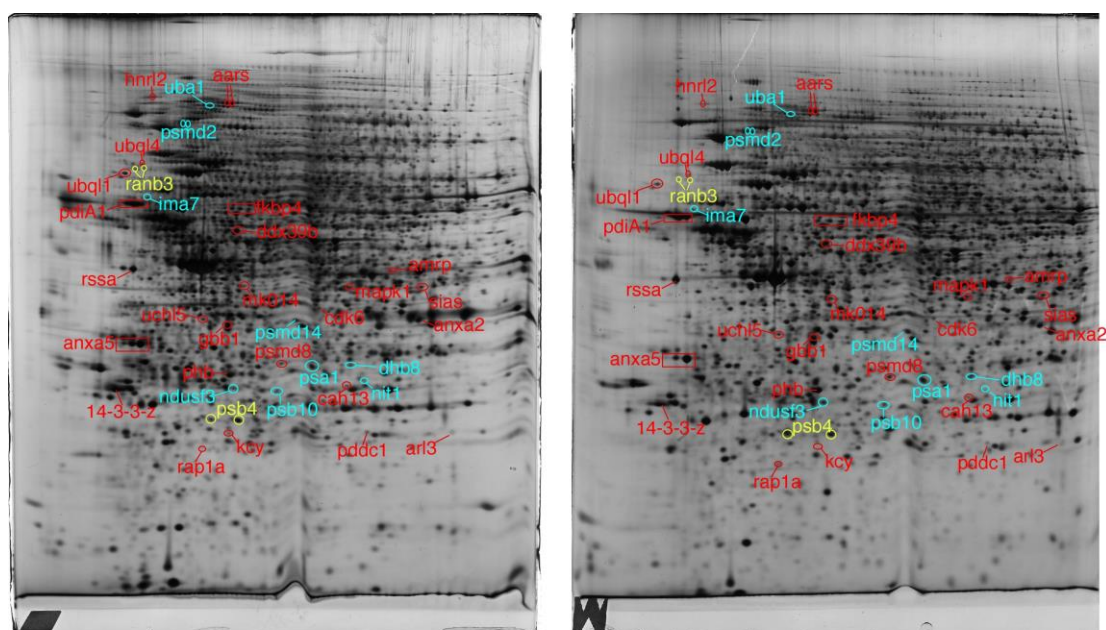

**A**

# B

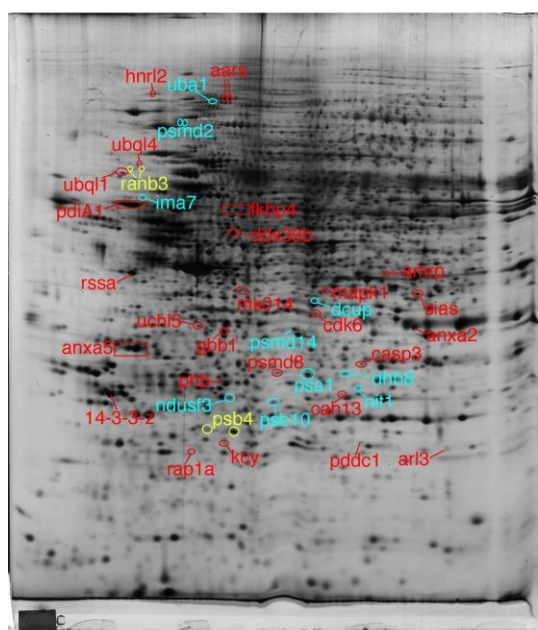

C

Supplementary Figure 2:

## Annotated gel images

A: control, unexposed cells

B : cells exposed to pyrolytic silica for 24 hours and collected just after exposure

C:cells exposed to pyrolytic silica for 24 hours, and left to recover without silica for 72 hours prior to harvesting

Proteins belonging to the ubiquitin/ proteasome system, lipid metabolism, signalling, mitochondrion and protein production and folding are highlighted in this figure

**Figure S2**



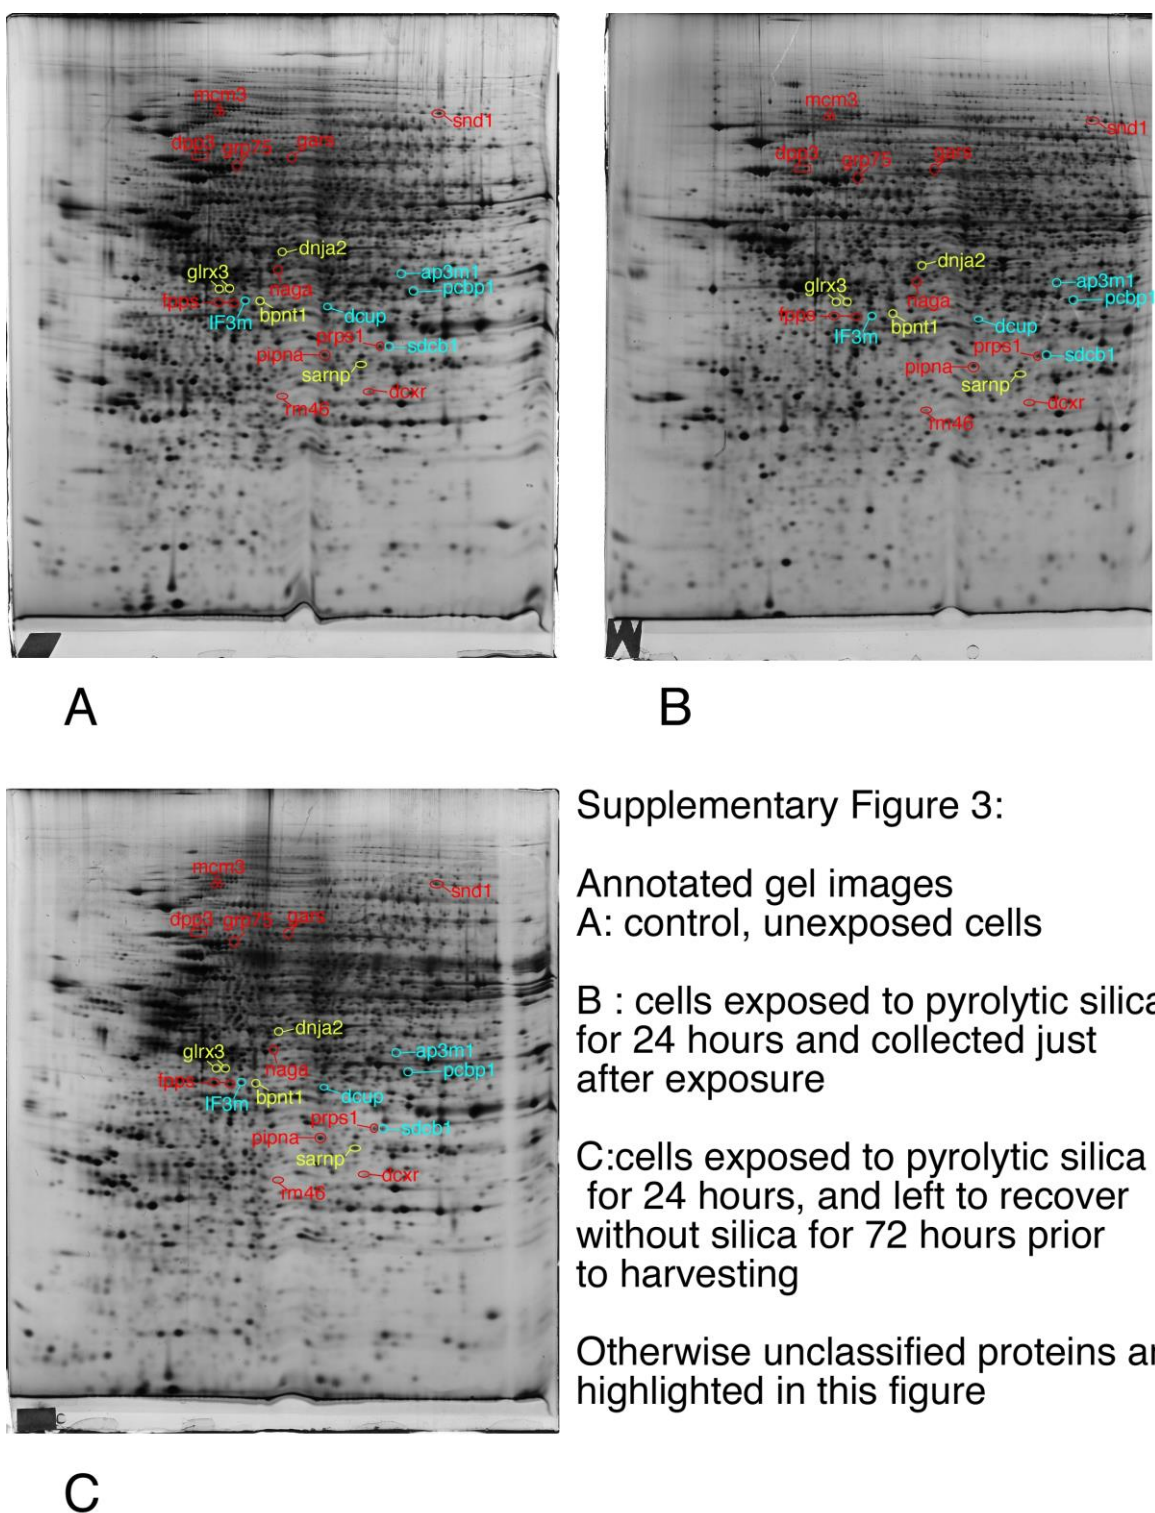

Figure S2
